# Supplementary material
Source: publisher figshare collection journal article supplement (https://tandf.figshare.com/ndownloader/files/35116273)
Supplement: Supplementary file 1 [file 35116273]

## Supplemental Materials

Table 1. Characteristics of interviewees

| <i>Characteristic</i>   | <i>First round (N=38)</i><br><i>n (%)</i> | <i>Second round (N=15)<sup>a</sup></i><br><i>n (%)</i> |
|-------------------------|-------------------------------------------|--------------------------------------------------------|
| Gender                  |                                           |                                                        |
| Male                    | 27 (71%)                                  | 9 (60%)                                                |
| Female                  | 10 (26%)                                  | 5 (33%)                                                |
| Gender non-conforming   | 1 (3%)                                    | 1 (7%)                                                 |
| Age                     |                                           |                                                        |
| 18-19                   | 1 (3%)                                    | 0 (0%)                                                 |
| 20-29                   | 3 (8%)                                    | 5 (33%)                                                |
| 30-39                   | 16 (42%)                                  | 6 (40%)                                                |
| 40-49                   | 8 (21%)                                   | 0 (0%)                                                 |
| 50-59                   | 6 (16%)                                   | 2 (13%)                                                |
| 60-69                   | 4 (11%)                                   | 1 (7%)                                                 |
| Not available           | 0 (0%)                                    | 1 (7%)                                                 |
| Residence <sup>b</sup>  |                                           |                                                        |
| U.S. Northeast          | 7 (18%)                                   | 3 (20%)                                                |
| U.S. Midwest            | 0 (0%)                                    | 2 (13%)                                                |
| U.S. South              | 10 (26%)                                  | 1 (7%)                                                 |
| U.S. West               | 18 (47%)                                  | 7 (47%)                                                |
| International           | 3 (8%)                                    | 2 (13%)                                                |
| Employer                |                                           |                                                        |
| Academic institution    | 9 (24%)                                   | 1 (7%)                                                 |
| Other or none           | 29 (76%)                                  | 14 (93%)                                               |
| Highest level education |                                           |                                                        |
| High school diploma/GED | 4 (11%)                                   | 1 (7%)                                                 |
| College graduate        | 7 (18%)                                   | 5 (33%)                                                |
| Graduate <sup>c</sup>   | 27 (71%)                                  | 8 (53%)                                                |
| PhD                     | 17 (45%)                                  | 4 (27%)                                                |
| MD                      | 2 (5%)                                    | 1 (7%)                                                 |
| MBA                     | 2 (5%)                                    | 0 (0%)                                                 |
| Other                   | 16 (42%)                                  | 3 (20%)                                                |
| Unknown/unconfirmed     | 0 (0%)                                    | 1 (7%)                                                 |

Percentages may not add up to 100% due to rounding.

<sup>a</sup> Interviewees in the second round of interviews comprised 14 individuals who had participated in the first round as well as an interviewee's partner who joined an interview. The partner had not participated in a first-round interview.

<sup>b</sup> U.S. regions defined by the U.S. Census Bureau.

<sup>c</sup> Not mutually exclusive.
